# Supplementary material for: Intratumoral administration of the Toll‐like receptor 7/8 agonist 3M‐052 enhances interferon‐driven tumor immunogenicity and suppresses metastatic spread in preclinical triple‐negative breast cancer
Source: PubMed Central journal article supplement — Clin Transl Immunology. 2020 Sep 28;9(9):e1177. doi: 10.1002/cti2.1177 (PMC7520806; doi:10.1002/cti2.1177), 2020-09-28
Supplement: CTI2-9-e1177-s001.pdf [file CTI2-9-e1177-s001.pdf]

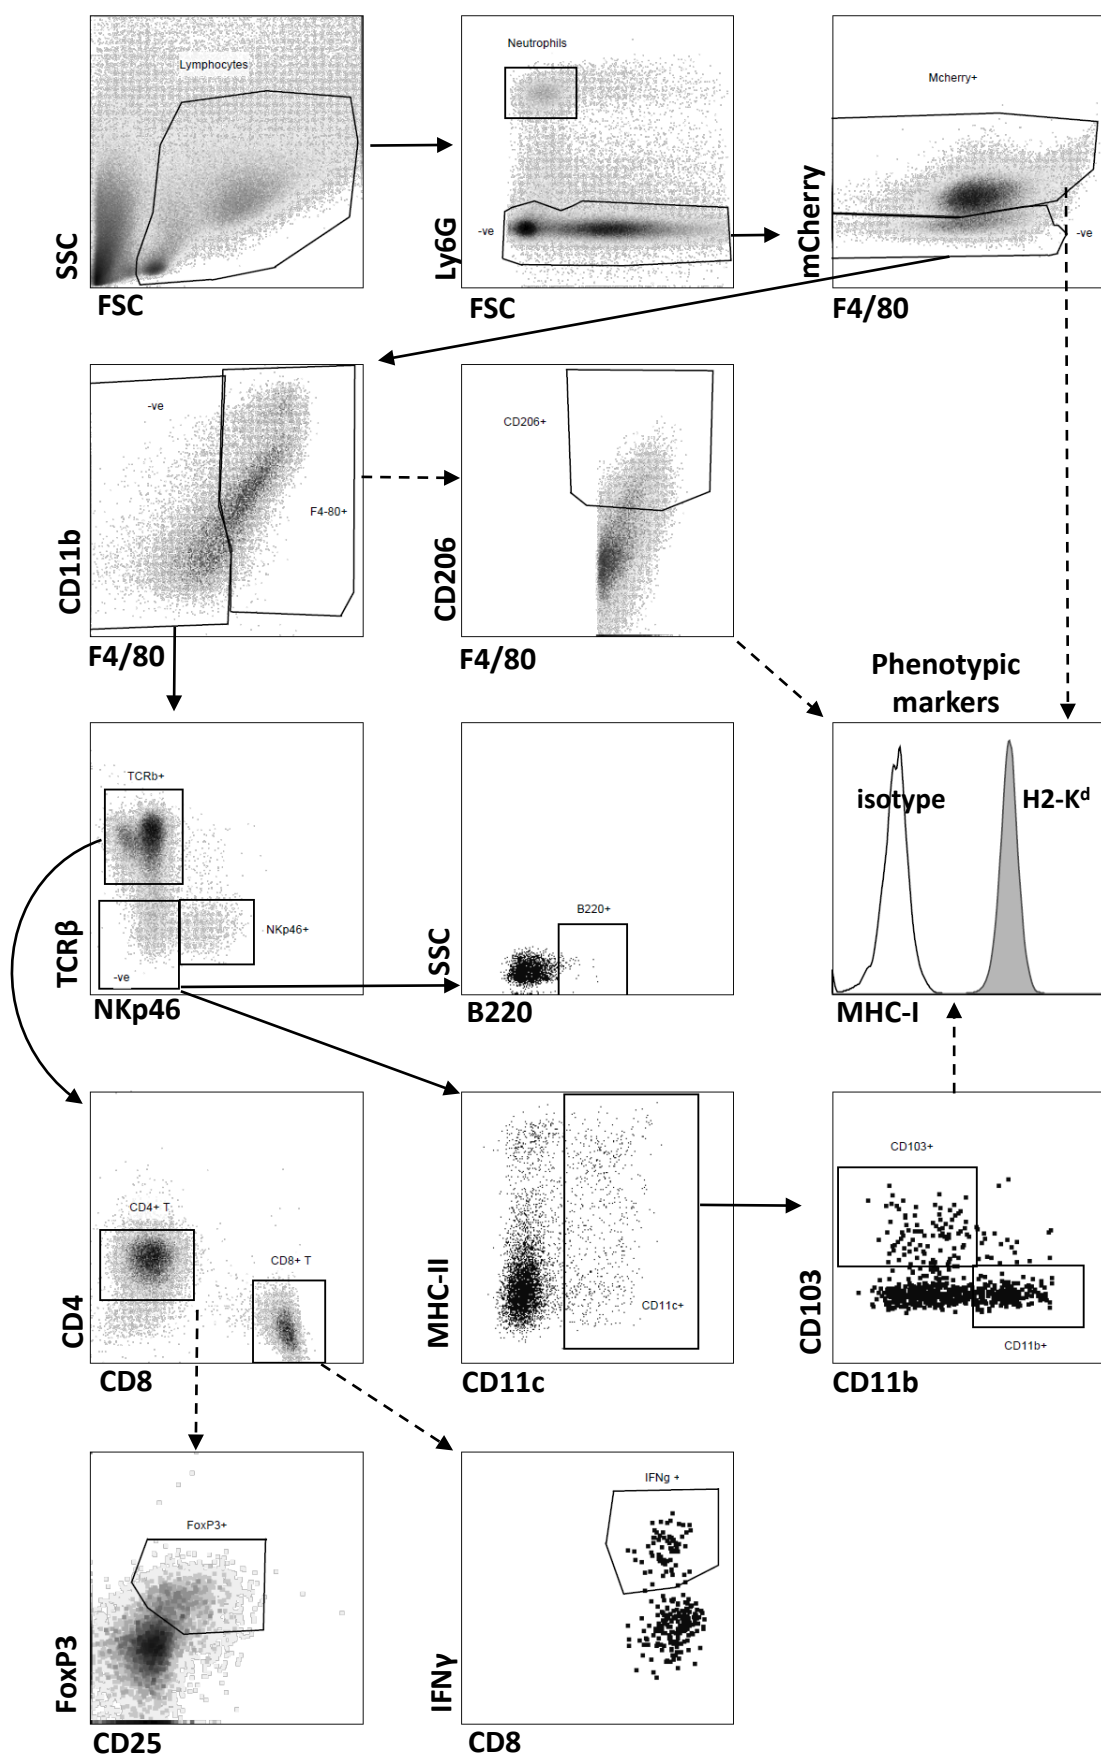

**Supplementary figure 1.** Flow cytometry gating strategy to analyse specific cell types.

Debris and dead cells were excluded by FSC, SSC gating; then segregated into neutrophils (Ly6G<sup>+</sup>), tumor cells (mCherry<sup>+</sup>), macrophages (F4/80<sup>+</sup>CD11b<sup>+</sup>CD206<sup>+</sup>). Negative populations were segregated into NK cells (NKp46<sup>+</sup>TCRβ<sup>-</sup>), B cells (B220<sup>+</sup>), T cells (CD4<sup>+</sup> T: TCRβ<sup>+</sup>CD4<sup>+</sup>, CD8<sup>+</sup> T: TCRβ<sup>+</sup>CD8<sup>+</sup>, Tregs: TCRβ<sup>+</sup>CD4<sup>+</sup>CD25<sup>+</sup>FoxP3<sup>+</sup>). Negative cells were further segregated into DC subsets (CD11c<sup>+</sup>MHC-II<sup>+</sup>CD11b<sup>+</sup>CD103<sup>+</sup>). CD8<sup>+</sup> T cells were further assessed for specificity by IFNγ expression. Cell subsets were assessed for phenotypic markers (i.e. MHC-I: grey histogram, isotype control white histogram).
