# Supplementary material for: Intratumoral administration of the Toll‐like receptor 7/8 agonist 3M‐052 enhances interferon‐driven tumor immunogenicity and suppresses metastatic spread in preclinical triple‐negative breast cancer
Source: PubMed Central journal article supplement — Clin Transl Immunology. 2020 Sep 28;9(9):e1177. doi: 10.1002/cti2.1177 (PMC7520806; doi:10.1002/cti2.1177), 2020-09-28
Supplement: CTI2-9-e1177-s002.pdf [file CTI2-9-e1177-s002.pdf]

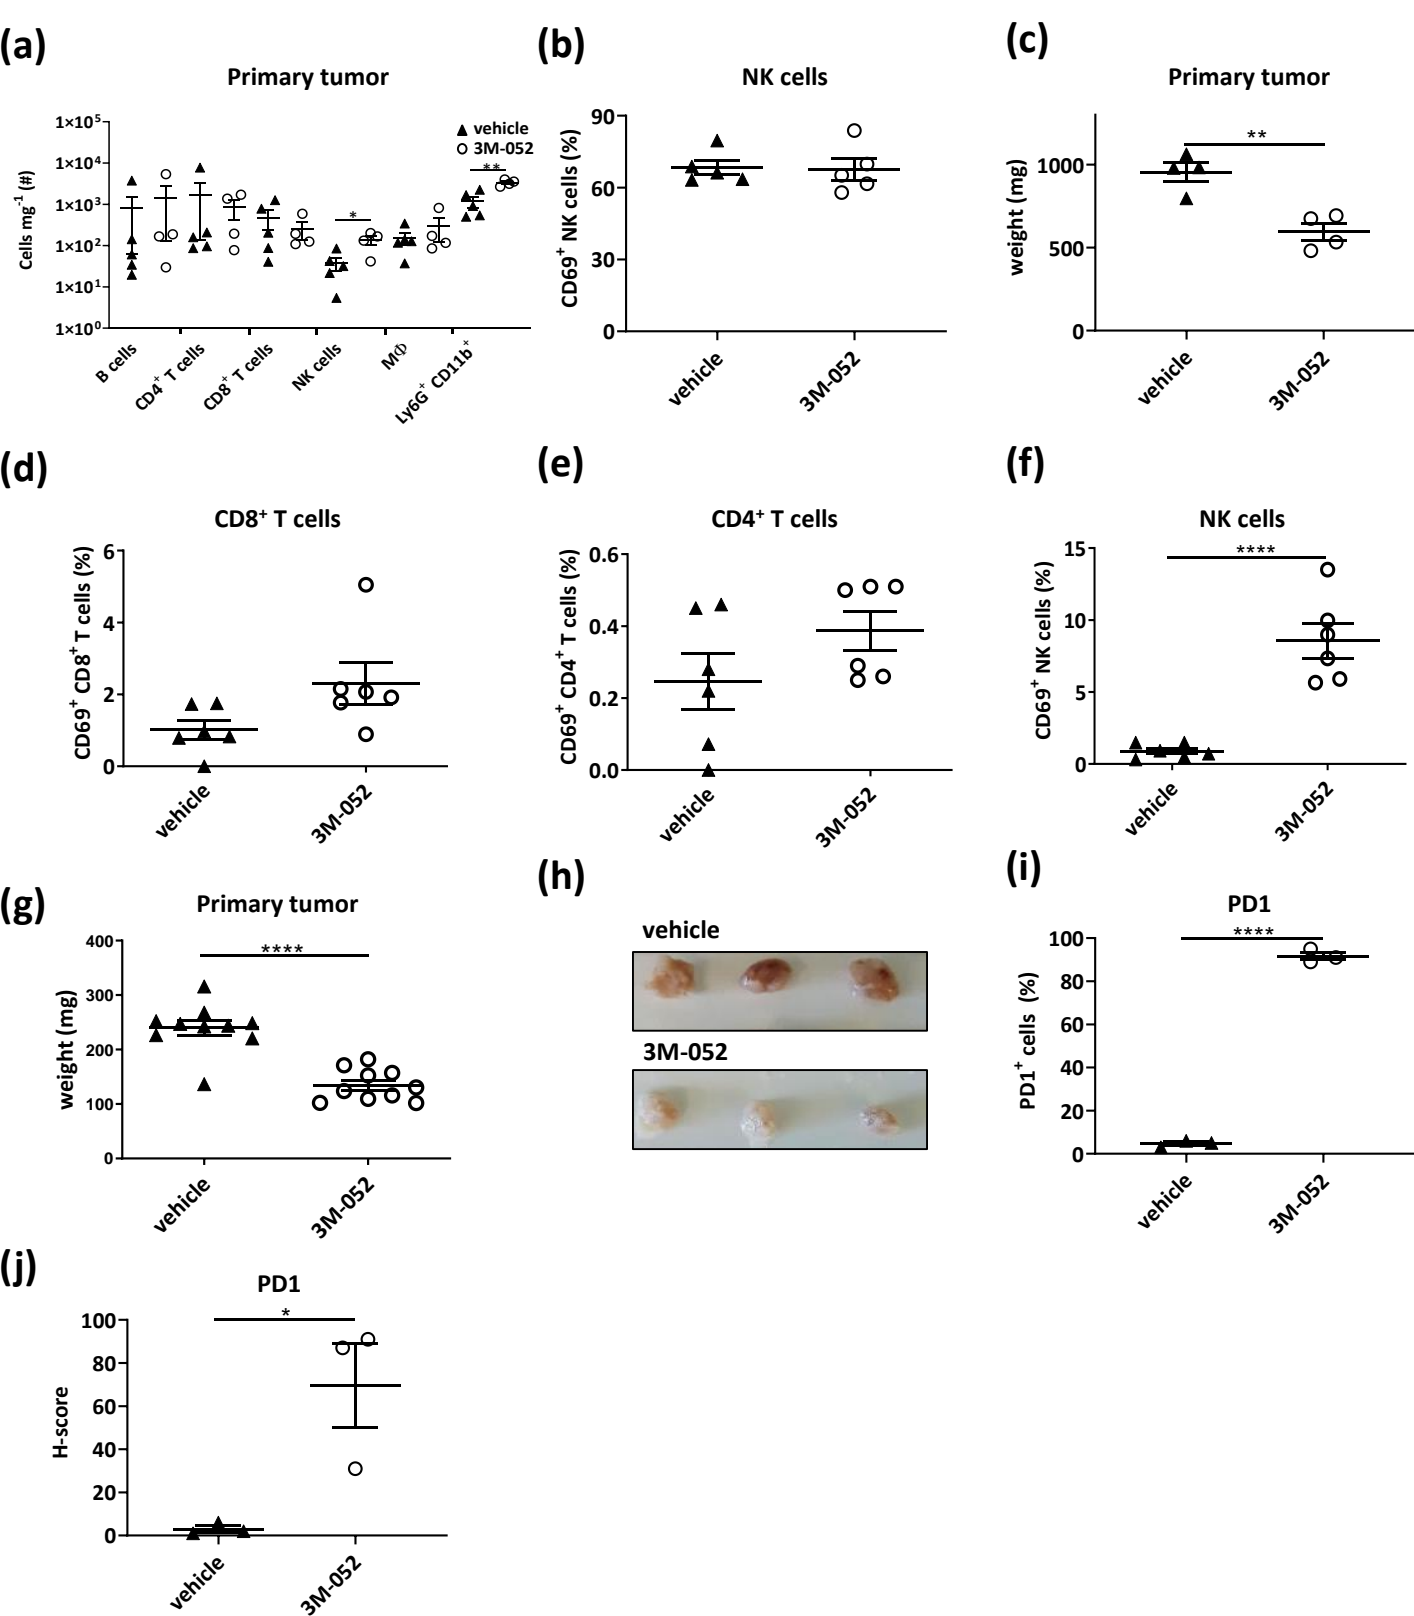

### Supplementary figure 2

C57B6/J mice were injected with  $1 \times 10^5$  E0771 cells into the 4<sup>th</sup> mammary fat pad and palpable tumors were i.t. injected with vehicle or 3M-052 on day 13 post-inoculation and **(a)** overall TIL proportions at endpoint and **(b)** NK1.1<sup>+</sup> cells were assessed for CD69 expression. BALB/c mice were injected with  $1 \times 10^5$  4T1.2 cells into the 4<sup>th</sup> mammary fat pad and palpable tumors were i.t. injected with vehicle or 3M-052 on day 5 post-inoculation. **(c)** For non-resection mice at endpoint primary tumor weights (mg) were recorded. On day 8, CD69 expression of **(d)**  $\text{CD3}^+\text{CD8}^+$  T cells, **(e)**  $\text{CD3}^+\text{CD4}^+$  T cells and **(f)**  $\text{TCR}\beta^+\text{NKp46}^+$  cells was assessed from peripheral blood by flow cytometry. **(g)** Day 12 resected primary tumors from i.t. vehicle or 3M-052 treated mice; **(h)** representative images shown. InForm software analysis of PD-1 staining from Figure 1c: **(i)** PD-1 positivity and **(j)** H-Score. Experiments were independently repeated twice, and representative data are shown. **(a)** **(b)**  $n = 5$  mice/group. **(c)**  $n = 4$  mice/group. **(d)** **(e)** **(f)**  $n = 6$  mice/group. **(g)**  $n = 10$  mice/group, **(h)** **(i)** **(j)**  $n = 3$  mice/group. Statistical analysis performed by Student's two-tailed  $t$  tests. Error bars are SEM. \*,  $P < 0.05$ ; \*\*,  $P < 0.01$ ; \*\*\*\*,  $P < 0.0001$ .
