# Supplementary material for: Intratumoral administration of the Toll‐like receptor 7/8 agonist 3M‐052 enhances interferon‐driven tumor immunogenicity and suppresses metastatic spread in preclinical triple‐negative breast cancer
Source: PubMed Central journal article supplement — Clin Transl Immunology. 2020 Sep 28;9(9):e1177. doi: 10.1002/cti2.1177 (PMC7520806; doi:10.1002/cti2.1177), 2020-09-28
Supplement: CTI2-9-e1177-s003.pdf [file CTI2-9-e1177-s003.pdf]

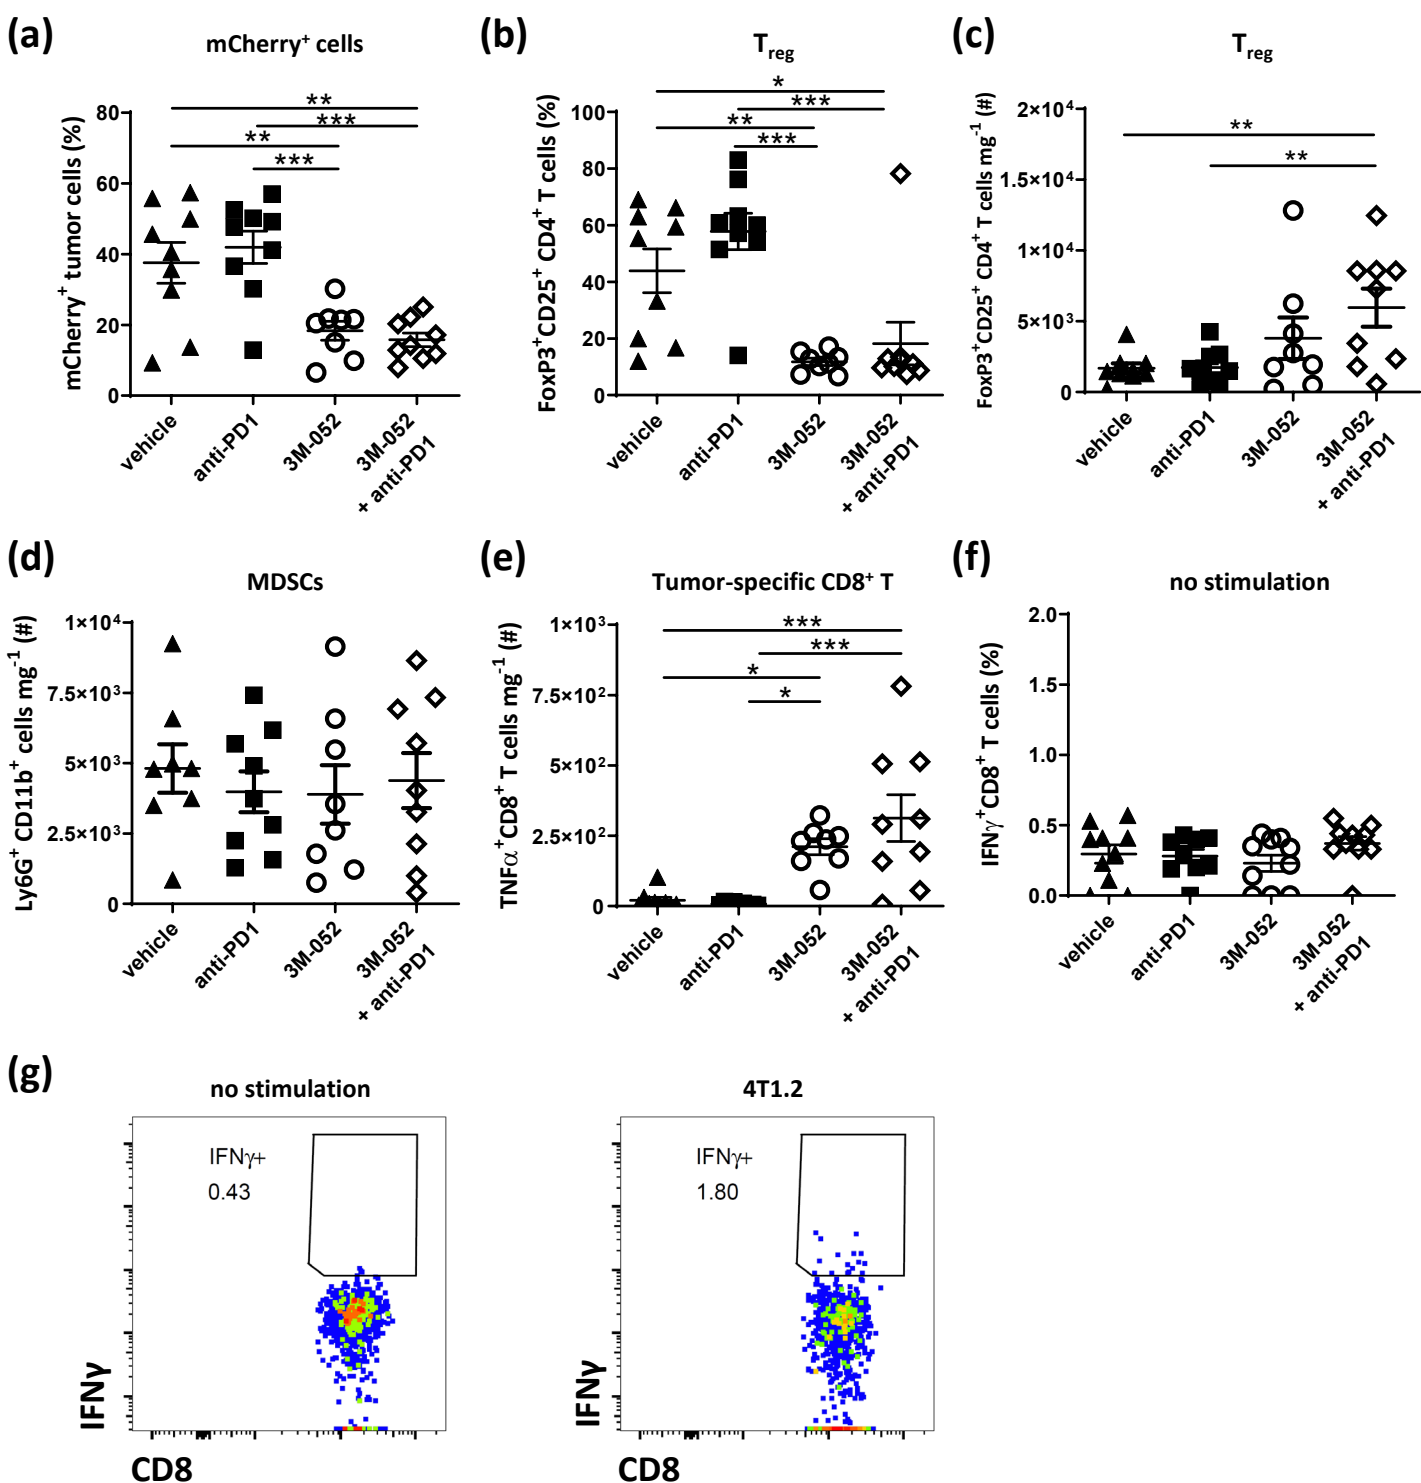

### Supplementary figure 3

BALB/c mice were injected with  $1 \times 10^5$  4T1.2 cells into 4<sup>th</sup> mammary fat pad and palpable tumors were i.t. injected with vehicle or 3M-052 on day 7 post-inoculation. Mice were treated with four doses of isotype or anti-PD1 mAb before primary tumor resection on day 14 (shown in Figure 2a). Primary tumors were assessed for **(a)** proportion of tumor that is 4T1.2 cells (mCherry<sup>+</sup>); **(b)** proportion TCR $\beta$ <sup>+</sup>CD4<sup>+</sup> that were CD25<sup>+</sup>FoxP3<sup>+</sup> Tregs; **(c)** number of TCR $\beta$ <sup>+</sup>CD4<sup>+</sup>CD25<sup>+</sup>FoxP3<sup>+</sup> Tregs; **(d)** Ly6G<sup>+</sup>CD11b<sup>+</sup> cell number and **(e)** TNF $\alpha$ <sup>+</sup>TCR $\beta$ <sup>+</sup>CD8<sup>+</sup> T cell number by flow cytometry. **(f)** TCR $\beta$ <sup>+</sup>CD8<sup>+</sup> cells from day 18 peripheral blood (PB) was assessed for IFN $\gamma$  production with no stimulation, **(g)** representative flow cytometry plots shown from individual 3M-052 + anti-PD1 PB sample demonstrating 4T1.2-specificity. Experiments were independently repeated twice, and representative data are shown.  $n = 8-9$  mice/group. Statistical analysis was performed by one-way ANOVA with post-hoc Tukey's multiple comparison test. Error bars are SEM. \*,  $P < 0.05$ ; \*\*,  $P < 0.01$ ; \*\*\*,  $P < 0.001$ .
