# Supplementary material for: Intratumoral administration of the Toll‐like receptor 7/8 agonist 3M‐052 enhances interferon‐driven tumor immunogenicity and suppresses metastatic spread in preclinical triple‐negative breast cancer
Source: PubMed Central journal article supplement — Clin Transl Immunology. 2020 Sep 28;9(9):e1177. doi: 10.1002/cti2.1177 (PMC7520806; doi:10.1002/cti2.1177), 2020-09-28
Supplement: CTI2-9-e1177-s006.pdf [file CTI2-9-e1177-s006.pdf]

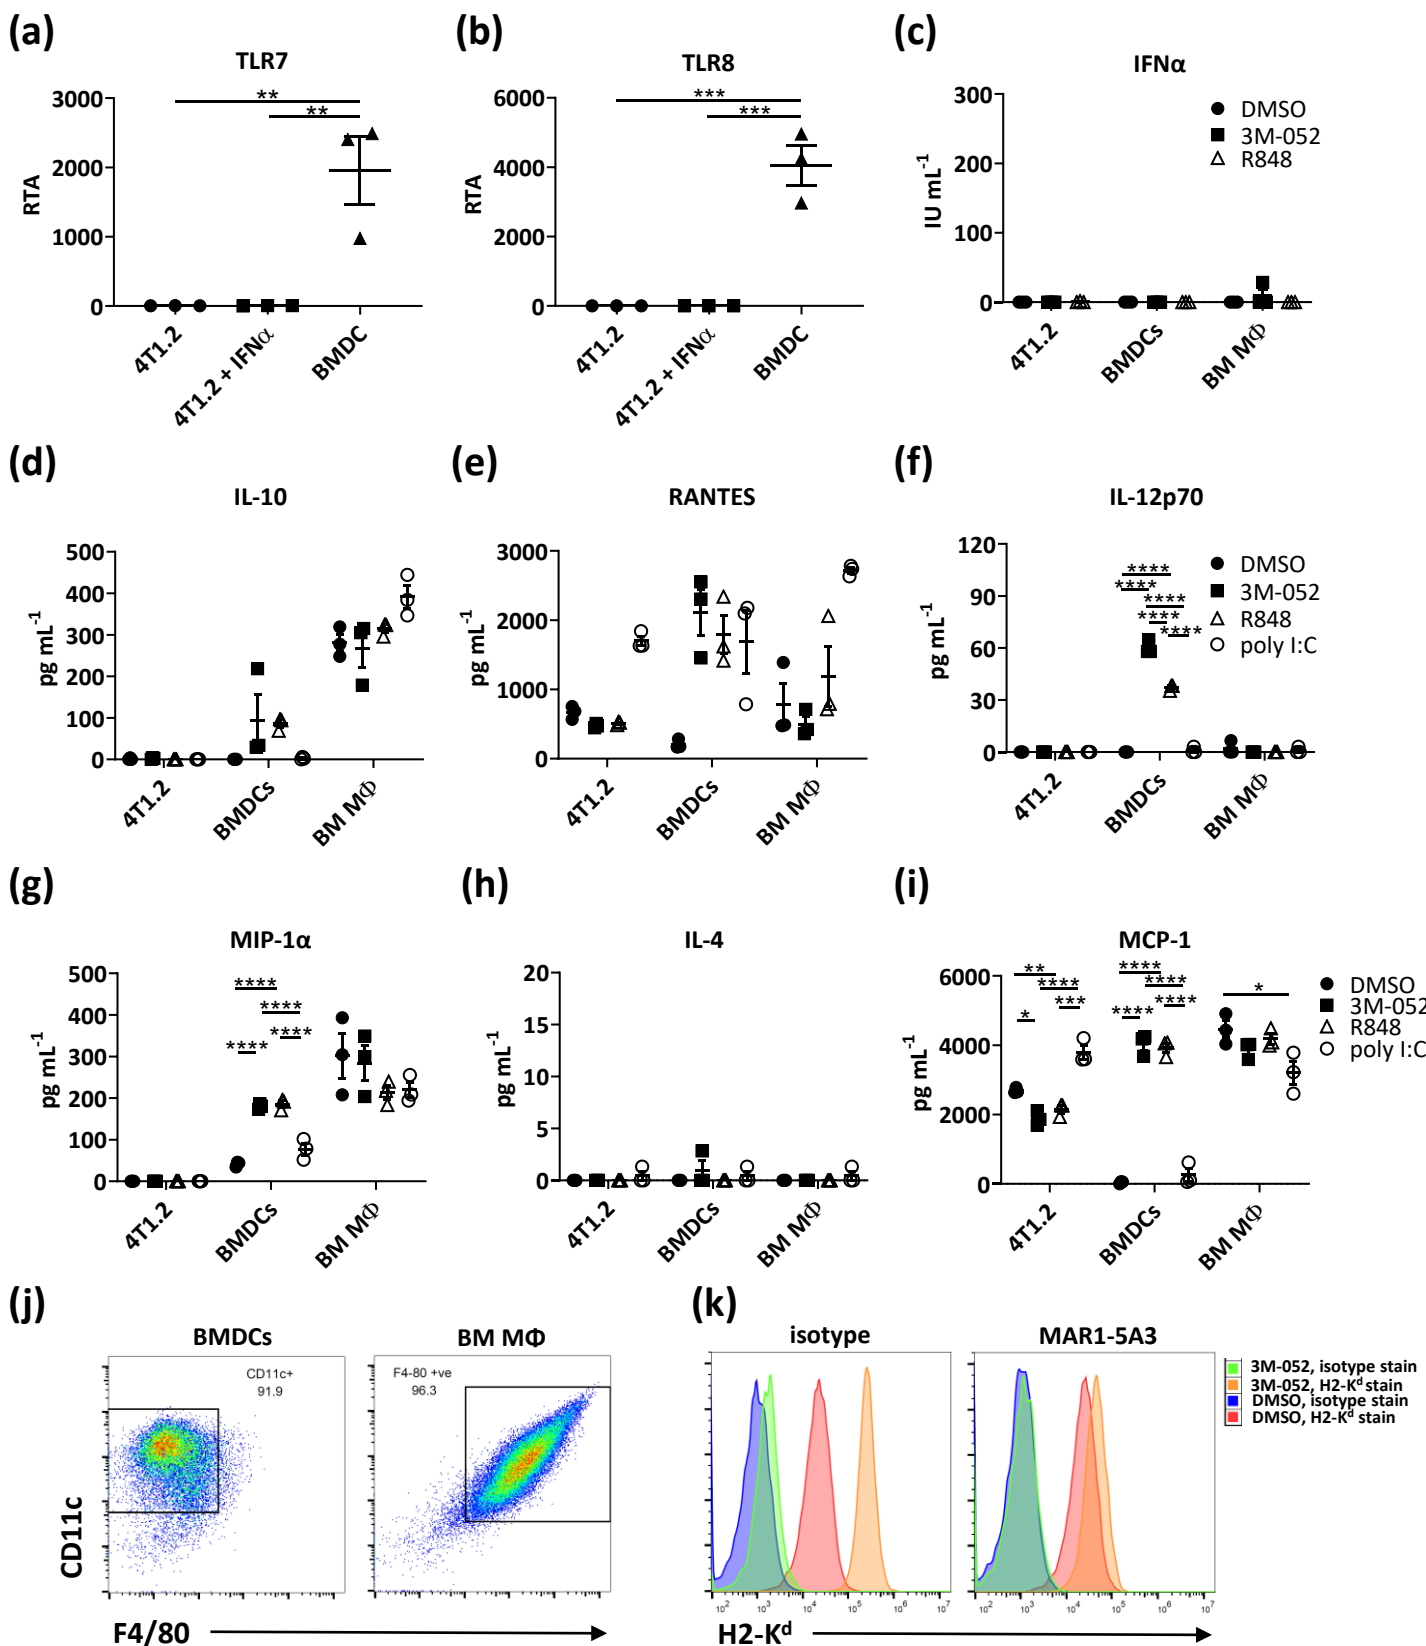

### Supplementary figure 6

**(a)** TLR7 and **(b)** TLR8 mRNA expression in 4T1.2 and BM-derived DCs by RT-qPCR. 4T1.2, BMDCs and BM macrophages were stimulated for 24 hrs with various IFN-agonists and assessed for production of **(c)** IFN $\alpha$  (ELISA), **(d)** IL-10, **(e)** RANTES, **(f)** IL-12p70, **(g)** MIP-1 $\alpha$ , **(h)** IL-4 and **(i)** MCP-1 by cytometric bead array (CBA). **(j)** Representative flow cytometry QC of day 8 BMDC and BM M $\Phi$  cultures. **(k)** Representative MHC-I histograms from Figure 6I of 4T1.2 cells cultured in the presence of medium derived from +/- 3M-052-stimulated BMDCs and isotype (mouse IgG1) or IFNAR blocking (MAR1-5A3) mAb. BM M $\Phi$ : bone-marrow derived macrophages. RTA: relative transcript abundance. Experiments were independently repeated twice, and representative data are shown.  $n = 3$  biological replicates/group. Data are one representative of two independent experiments. Statistical analysis was performed by one-way ANOVA with post-hoc Tukey's multiple comparison test. Error bars are SEM. \*,  $P < 0.05$ ; \*\*,  $P < 0.01$ ; \*\*\*,  $P < 0.001$ ; \*\*\*\*,  $P < 0.0001$ .
