# Supplementary material for: Intratumoral administration of the Toll‐like receptor 7/8 agonist 3M‐052 enhances interferon‐driven tumor immunogenicity and suppresses metastatic spread in preclinical triple‐negative breast cancer
Source: PubMed Central journal article supplement — Clin Transl Immunology. 2020 Sep 28;9(9):e1177. doi: 10.1002/cti2.1177 (PMC7520806; doi:10.1002/cti2.1177), 2020-09-28
Supplement: CTI2-9-e1177-s007.pdf [file CTI2-9-e1177-s007.pdf]

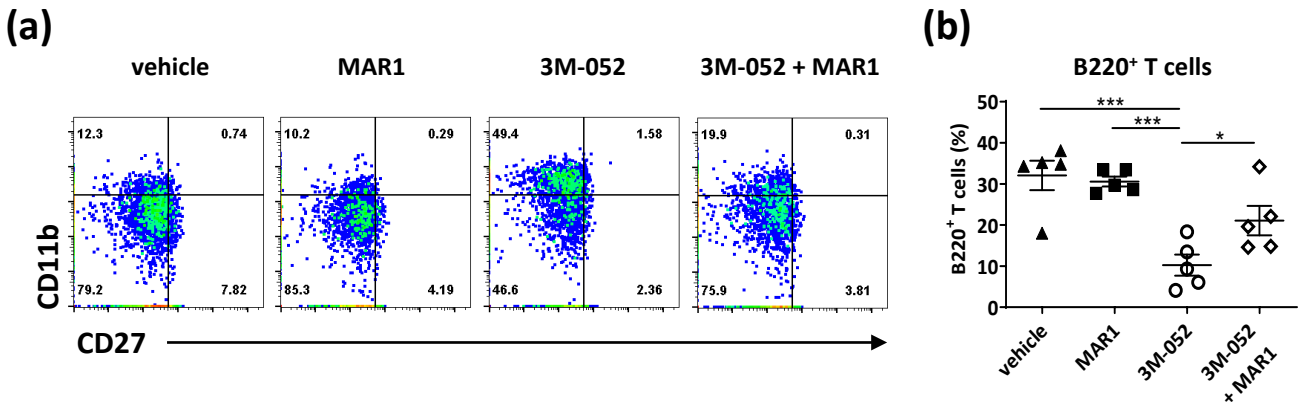

### Supplementary figure 7

BALB/c mice were injected with  $1 \times 10^5$  4T1.2 cells into the 4<sup>th</sup> mammary fat pad and palpable tumors were i.t. injected with vehicle or 3M-052 on day 7 post-inoculation. Mice were treated with four doses of isotype or MAR1-5A3 mAb and primary tumors resected on day 13 (shown in figure 7a). Primary tumors were resected and **(a)** NKp46<sup>+</sup>TCR $\beta$ <sup>-</sup> cells were assessed for CD11b and CD27 expression (representative plots shown), and **(b)** TCR $\beta$ <sup>+</sup> cells were assessed for B220 expression by flow cytometry. Data representative of one experiment.  $n = 5$  mice/group. Statistical analysis was performed by one-way ANOVA with post-hoc Tukey's multiple comparison test. \*,  $P < 0.05$ ; \*\*\*,  $P < 0.001$ .
