# Supplementary material for: Intratumoral administration of the Toll‐like receptor 7/8 agonist 3M‐052 enhances interferon‐driven tumor immunogenicity and suppresses metastatic spread in preclinical triple‐negative breast cancer
Source: PubMed Central journal article supplement — Clin Transl Immunology. 2020 Sep 28;9(9):e1177. doi: 10.1002/cti2.1177 (PMC7520806; doi:10.1002/cti2.1177), 2020-09-28
Supplement: CTI2-9-e1177-s008.pdf [file CTI2-9-e1177-s008.pdf]

Supplementary table 1. Primers used in this study

| Name              | Sequence 5' → 3'                        |
|-------------------|-----------------------------------------|
| mTLR7-F           | GGTATGCCGCCAAATCTAAA                    |
| mTLR7-R           | GGTTATGGCTGAGGTCCAAA                    |
| hTLR7-F           | CCTTGTGCGCCGTGTAAAAA                    |
| hTLR7-R           | GGGCACATGCTGAAGAGAGT                    |
| mTLR8-F           | TGCACATTCCCTGGAGACAC                    |
| mTLR8-R           | GATTCCTGGCTTCGGAGAGG                    |
| hTLR8-F           | TGCCTCATCTGAAGGTGCTG                    |
| hTLR8-R           | ATTTCTAAGCGGGGCAGCAT                    |
| mHprt-F           | GGCCAGACTTTGTTGGATTT                    |
| mHprt-R           | ACTGGCAACATCAACAGGACT                   |
| hHprt-F           | TATGGCGACCCGCAGCCCT                     |
| hHprt-R           | CATCTCGAGCAAGACGTTTCAG                  |
| mCherryF          | GACCACCTACAAGGCCAAGAAG                  |
| mCherry-R         | AGGTGATGTCCAACCTTGATGTTGA-              |
| mCherry (probe)   | FAM/CAGCTGCCC/ZEN/GGCGCCTACA/3IABkFQ    |
| mVimentin-F       | AGCTGCTAACTACCAGGACACTATTG              |
| mVimentin-R       | CGAAGGTGACGAGCCATCTC                    |
| mVimentin (probe) | HEX/CTTTCATGTTTTGGATCTCATCCTGCAGG/TAMRA |
